# Supplementary material for: Enhanced current-rectification in bilayer graphene with an electrically tuned sloped bandgap
Source: Royal Society of Chemistry journal article supplement (doi:10.1039/c2nr32526h), 2012-01-01
Supplement: c2nr32526h.pdf [file c2nr32526h.pdf]

## SUPPLEMENTARY SECTION

### Enhanced current-rectification in bilayer graphene with an electrically tuned sloped band gap

Alex Aparecido-Ferreira<sup>a</sup>, Hisao Miyazaki<sup>a</sup>, Song-Lin Li<sup>b</sup>,  
Katsuyoshi Komatsu<sup>a</sup>, Shu Nakaharai<sup>c</sup> and Kazuhito Tsukagoshi<sup>a</sup>

<sup>a</sup> *WPI-MANA, NIMS, Tsukuba 305-0047, Japan*

<sup>b</sup> *ICYS-MANA, NIMS, Tsukuba 305-0047, Japan*

<sup>c</sup> *GNC, AIST, Tsukuba 305-8569, Japan*

#### 1. *Device Fabrication:*

The bilayer graphene (BLG) flakes were obtained by micromechanical cleavage of Kish graphite, and deposited on a highly doped Si substrate with a 285 nm-thick SiO<sub>2</sub> layer. The flakes were identified by the contrast method of the optical reflection<sup>1,2</sup>. The patterning of the electrodes and of the graphene channel was performed by electron-beam (e-beam) lithography. For the e-beam lithography, we spin-coated two layers of resist, composed by MMA (8.5) copolymer and 950k-PMMA (both supplied by Nano<sup>TM</sup> MicroChem). The resists were developed with a 1:3 mixture of MiBK (Sigma-Aldrich) and isopropyl alcohol. After e-beam exposure and developing, it was formed an undercut space underneath the top layer resist. The deposition of the metals and patterning of the BLG channel were performed as follows:

1. The source-drain electrodes: Ti (5nm) and Au (50 nm) were deposited by thermal evaporation of the metal sources.
2. The patterning of BLG channel: an etching by oxygen plasma defined a channel with length about 28 μm and width about 4.7 μm.
3. The SiO<sub>2</sub> top-gate electrode: the undercut profile of the resist polymer was fundamental to make the sloped profile of the top-gate. The deposition of the SiO<sub>2</sub> by e-beam followed sequential angle evaporations, as it is showed in Fig. S1(a). The substrate was rotated around a fixed axis, from -20 to 20 degrees, with steps of 4 degrees. For each step, 1 nm of SiO<sub>2</sub> was deposited. Because of partial shading effect due to the undercut space underneath the top resist layer, the sloped SiO<sub>2</sub> top-gate is formed (Fig. S1(b)). The height of the SiO<sub>2</sub> top-

gate and the sloped-side region were determined by non-contact atomic force microscopy (Fig. S1(c)).

4. The  $\text{AlO}_x$  top-gate electrode on the BLG and on  $\text{SiO}_2$  sloped top-gate: the 60 nm-thick Al layer was deposited by thermal evaporation. According to Miyazaki *et al.*<sup>3,4,5</sup>, even the surface of Al in contact with the BLG or  $\text{SiO}_2$  was oxidized, and the  $\text{AlO}_x$  layer on the top of the BLG was used as top-gate contact.

After each deposition of metal, the lift-off process was performed using acetone and isopropyl alcohol.

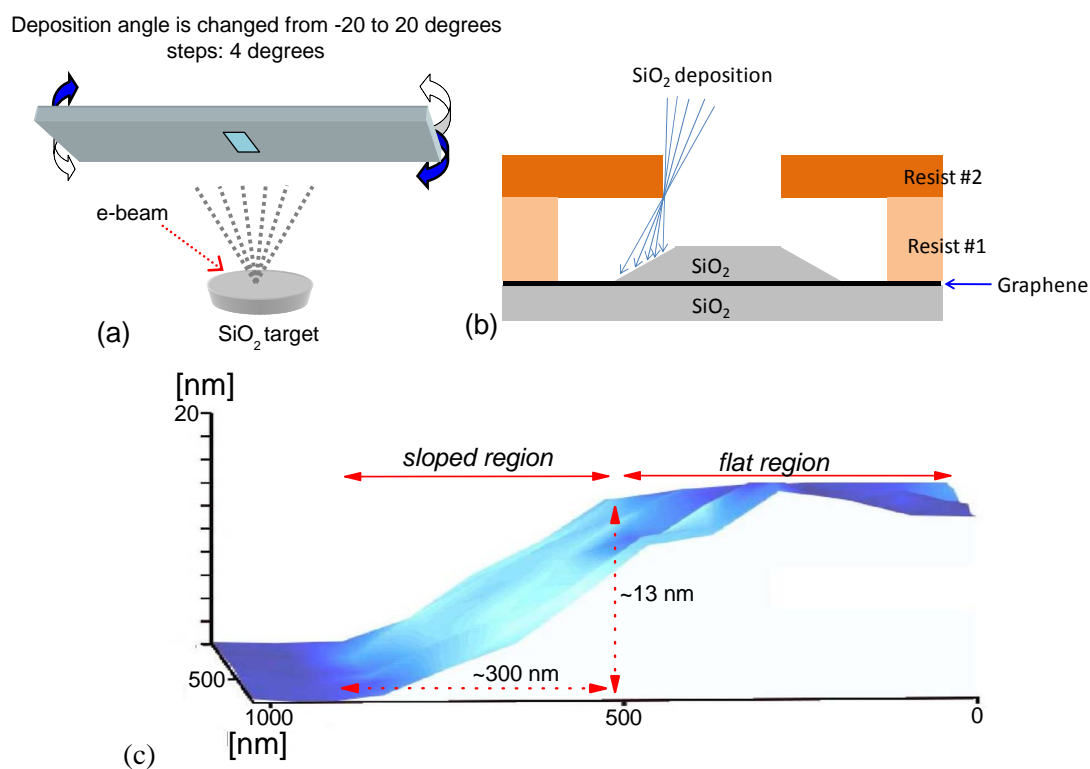

Fig. S1: (a) Deposition method of the  $\text{SiO}_2$  top-gate. The deposition angle was changed from -20 to 20 degrees in steps of 4 degrees. (b) Schematic figure showing the undercut space underneath the top layer resist and the formation of the sloped  $\text{SiO}_2$  top-gate (c) AFM image of the sloped  $\text{SiO}_2$  top-gate electrode, showing the height and the sloped side region.

## 2. The widening of the insulating region between p and n regions in sloped junctions:

According to our previous report by Miyazaki *et al.*<sup>4</sup>, in the gate-controllable pn junctions, the depletion region is neutrally charged. This occurs due to a transient region around the pn interface where the top electrical field changes from an  $E_{tn}$  to  $E_{tp}$

value. Usually, the transient region width determines the depletion region<sup>4</sup>. In case of an abrupt junction, the top-gate electrical fields changes abruptly in the interface, leading to a narrow transient region.

For sloped junctions, the top-electrical field changes smoother between  $p$  and  $n$  areas. The transient region is larger than in the abrupt junction, and the charge concentration is zero at a larger range around the  $pn$  interface, leading to a wider depletion region in sloped junctions.

#### References:

1. P. Blake, E. W. Hill, A. H. Castro Neto, K. S. Novoselov, D. Jiang, R. Yang, T. J. Booth and A. K. Geim, *Appl. Phys. Lett.*, 2007, **91**, 063124.
2. H. Hiura, H. Miyazaki and K. Tsukagoshi, *Appl. Phys. Express*, 2010, **3**, 095101.
3. H. Miyazaki, K. Tsukagoshi, A. Kanda, M. Otani and S. Okada, *Nano Lett.*, 2010, **10**, 3888.
4. H. Miyazaki, M. V. Lee, S.-L. Li, H. Hiura, A. Kanda and K. Tsukagoshi, *J. Phys. Soc. Jpn.*, 2012, **81**, 14708.
5. H. Miyazaki, S.-L. Li, A. Kanda and K. Tsukagoshi, *Semicond. Sci. Technol.*, 2010, **25**, 034008.
